# Supplementary material for: Adaptive and degenerative evolution of the S-Phase Kinase-Associated Protein 1-Like family in Arabidopsis thaliana
Source: PeerJ. 2019 Apr 12;7:e6740. doi: 10.7717/peerj.6740 (PMC6463862; doi:10.7717/peerj.6740)
Supplement: Supplemental Information 3 — β-galactosidase. [file peerj-07-6740-s003.xlsx]

## Sheet: Sheet1
Table S3. Raw data for beta-galactosidase activity assay
	Bait	Prey	OD600 (1/10 dilution)	OD420
				Plate 1 (48MIN)	Plate 2 (5HR13MIN, 1/5 dilution)	Plate3 (22h11m, 1/10 dilution)	galactosidase activity (based on Plate 3)			Bait	Prey	Rep1	Rep2	Mean	Stdev					Mean		Stdev
Rep1	FBP7	ASK1	0.71	0.454	0.74	0.4219	0.00044645			FBP7	ASK1	0.00044645	0.000428147	0.000437298	1.29427e-05					ASK1	ASK2	ASK1	ASK2
	UFO	ASK1	0.75	1.1789	1.28	0.4208	0.000421538			UFO	ASK1	0.000421538	0.000462157	0.000441848	2.87225e-05				FBP7	0.000437298	0.000490383	1.29427e-05	9.94873e-05
	SKIP4	ASK1	0.65	0.5171	0.85	0.4362	0.00050419			SKIP4	ASK1	0.00050419	0.000496089	0.000500139	5.72847e-06				UFO	0.000441848	0.000518694	2.87225e-05	8.06167e-06
	PP2-A12	ASK1	0.61	0.1422	0.27	0.2523	0.000310749			PP2-A12	ASK1	0.000310749	0.000279639	0.000295194	2.19976e-05				SKIP4	0.000500139	0.000566289	5.72847e-06	1.74701e-05
	CFB	ASK1	0.63	0.2311	0.43	0.3241	0.00038651			CFB	ASK1	0.00038651	0.000370529	0.00037852	1.12998e-05				PP2-A12	0.000295194	0.00045671	2.19976e-05	3.93457e-05
	FBL17	ASK1	0.65	0.124	0.22	0.2283	0.000263885			FBL17	ASK1	0.000263885	0.00022455	0.000244218	2.78138e-05				CFB	0.00037852	0.000385439	1.12998e-05	4.39954e-05
REP2	FBP7	ASK1	0.73	0.3887	0.61	0.416	0.000428147			JMJ22	ASK1	0.000198608	0.000192248	0.000195428	4.49737e-06				FBL17	0.000244218	0.000264176	2.78138e-05	3.7883e-05
	UFO	ASK1	0.76	0.7317	1.15	0.4675	0.000462157			SKIP16	ASK1	0.000519242	0.000542475	0.000530858	1.6428e-05				JMJ22	0.000195428	7.39009e-05	4.49737e-06	1.76781e-05
	SKIP4	ASK1	0.68	0.4272	0.77	0.449	0.000496089			FBS4	ASK1	0.000334282	0.000309009	0.000321645	1.78712e-05				SKIP16	0.000530858	0.000499471	1.6428e-05	0.000115051
	PP2-A12	ASK1	0.5	0.0771	0.16	0.1861	0.000279639			MEE11	ASK1	0.000569418	0.00061022	0.000589819	2.8852e-05				FBS4	0.000321645	0.000373946	1.78712e-05	0.000121784
	CFB	ASK1	0.63	0.1769	0.41	0.3107	0.000370529			AD	ASK1	1.87829e-06	0	9.39144e-07	1.32815e-06				MEE11	0.000589819	0.000562264	2.8852e-05	4.44254e-05
	FBL17	ASK1	0.89	0.1469	0.26	0.266	0.00022455			BLANK	ASK1	0	0	0	0				AD	9.39144e-07	0	1.32815e-06	0
Rep1	JMJ22	ASK1	0.69	0.0889	0.17	0.1824	0.000198608			BLANK	ASK1	0	0	0	0
	SKIP16	ASK1	0.63	0.5099	0.9	0.4354	0.000519242			FBP7	ASK2	0.000560731	0.000420035	0.000490383	9.94873e-05
	FBS4	ASK1	0.71	0.2084	0.39	0.3159	0.000334282			UFO	ASK2	0.000524394	0.000512993	0.000518694	8.06167e-06
	MEE11	ASK1	0.57	0.4101	0.8	0.432	0.000569418			SKIP4	ASK2	0.000578642	0.000553935	0.000566289	1.74701e-05
	AD	ASK1	0.56	0.0019	0	0.0014	1.87829e-06			PP2-A12	ASK2	0.000484532	0.000428889	0.00045671	3.93457e-05
	BLANK	ASK1	0.02	0	0	0	0			CFB	ASK2	0.00035433	0.000416549	0.000385439	4.39954e-05
	BLANK	ASK1	0.0052	0	0	0	0			FBL17	ASK2	0.000290964	0.000237389	0.000264176	3.7883e-05
REP2	JMJ22	ASK1	0.68	0.0826	0.15	0.174	0.000192248			JMJ22	ASK1	8.64012e-05	6.14006e-05	7.39009e-05	1.76781e-05
	SKIP16	ASK1	0.59	0.3344	0.69	0.426	0.000542475			SKIP16	ASK2	0.000580824	0.000418118	0.000499471	0.000115051
	FBS4	ASK1	0.62	0.1099	0.21	0.255	0.000309009			FBS4	ASK2	0.00046006	0.000287831	0.000373946	0.000121784
	MEE11	ASK1	0.59	0.4331	0.77	0.4792	0.00061022			MEE11	ASK2	0.000530851	0.000593678	0.000562264	4.44254e-05
	AD	ASK1	0.62	0.0016	0	0	0			AD	ASK2	0	0	0	0
	BLANK	ASK1	0.02	0	0		0			BLANK	ASK2	#DIV/0!	#DIV/0!	#DIV/0!	#DIV/0!
	BLANK	ASK1	0.02	0	0		0			BLANK	ASK2	#DIV/0!	#DIV/0!	#DIV/0!	#DIV/0!
Rep1	FBP7	ASK2	0.6	0.4862	0.7326	0.4478	0.000560731
	UFO	ASK2	0.64	0.7563	1.0497	0.4467	0.000524394
	SKIP4	ASK2	0.58	0.622	0.9779	0.4467	0.000578642
	PP2-A12	ASK2	0.57	0.2377	0.5628	0.3676	0.000484532
	CFB	ASK2	0.62	0.1402	0.367	0.2924	0.00035433
	FBL17	ASK2	0.55	0.0602	0.1684	0.213	0.000290964
REP2	FBP7	ASK2	0.75	0.4844	0.6923	0.4193	0.000420035
	UFO	ASK2	0.68	0.587	0.7777	0.4643	0.000512993
	SKIP4	ASK2	0.59	0.538	0.8841	0.435	0.000553935
	PP2-A12	ASK2	0.47	0.1185	0.3339	0.2683	0.000428889
	CFB	ASK2	0.61	0.1647	0.3923	0.3382	0.000416549
	FBL17	ASK2	0.57	0.0905	0.1466	0.1801	0.000237389
Rep1	JMJ22	ASK2	0.6	0.0287	0.0697	0.069	8.64012e-05
	SKIP16	ASK2	0.52	0.3819	0.5939	0.402	0.000580824
	FBS4	ASK2	0.47	0.1738	0.3051	0.2878	0.00046006
	MEE11	ASK2	0.64	0.5089	0.8643	0.4522	0.000530851
	AD	ASK2	0.75	0.0027	0	0	0
	BLANK	ASK2	0	0	0		#DIV/0!
	BLANK	ASK2	0	0	0		#DIV/0!
REP2	JMJ22	ASK2	0.58	0.0266	0.0438	0.0474	6.14006e-05
	SKIP16	ASK2	0.66	0.3188	0.5083	0.3673	0.000418118
	FBS4	ASK2	0.58	0.1189	0.2048	0.2222	0.000287831
	MEE11	ASK2	0.54	0.3956	0.6561	0.4267	0.000593678
	AD	ASK2	0.52	0.0022	0	0	0
	BLANK	ASK2	0	0	0		#DIV/0!
	BLANK	ASK2	0	0	0		#DIV/0!
